# Supplementary material for: Octahedral and truncated high-voltage spinel cathodes: the role of morphology and surface planes in electrochemical properties
Source: Royal Society of Chemistry journal article supplement (doi:10.1039/c3ta00682d), 2013-01-01
Supplement: c3ta00682d.pdf [file c3ta00682d.pdf]

## Supporting Information

### **Octahedral and truncated high-voltage spinel cathodes: the role of morphology and surface planes on electrochemical properties**

Katharine R. Chemelewski, Dong Wook Shin, Wei Li, and Arumugam Manthiram\*<sup>a</sup>

*a Materials Science and Engineering Program, The University of Texas at Austin, Austin, TX, USA. Fax: 512-475-8482; Tel: 512-471-1791; E-mail: manth@austin.utexas.edu*

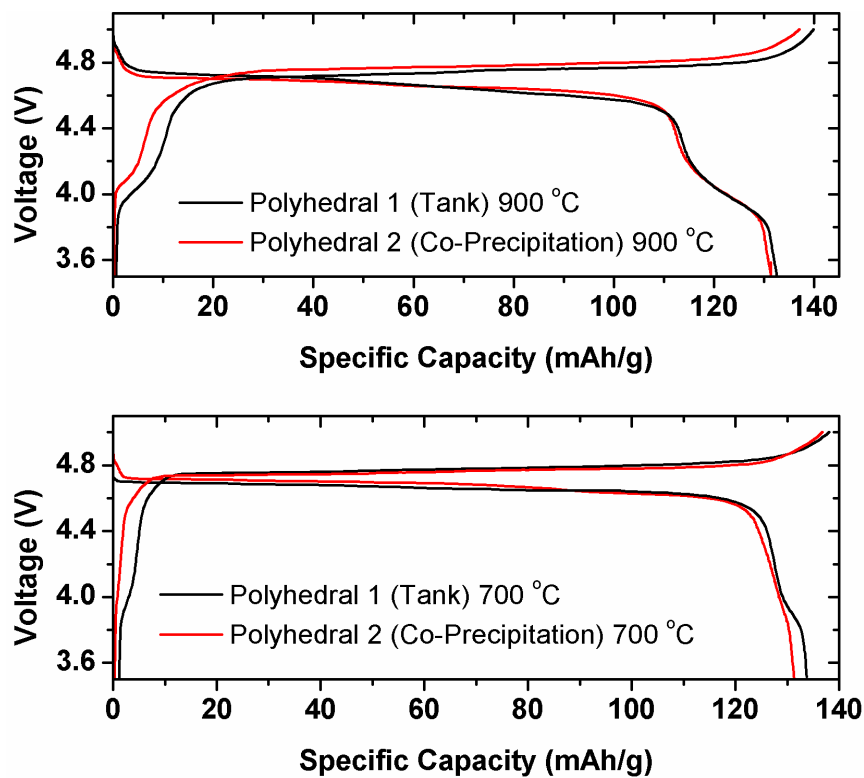

**Figure S1:** First-charge/discharge profiles of Polyhedral 1 and Polyhedral 2 samples before and after post-annealing process at 700 °C, demonstrating the elimination of  $\text{Mn}^{3+}$  after the annealing process.

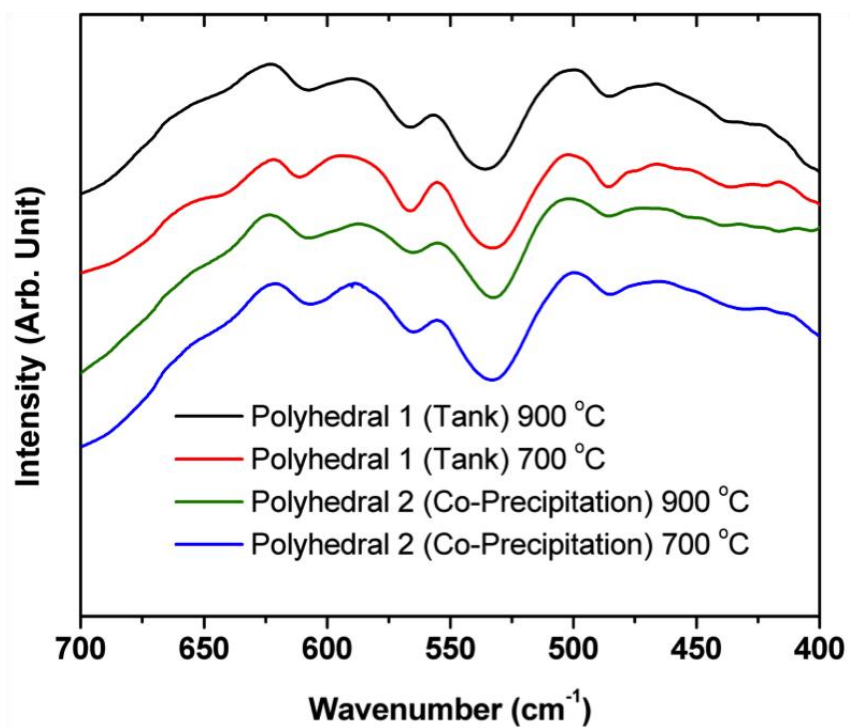

**Figure S2:** FTIR data indicating an increase in the degree of cation ordering after annealing at 700 °C.

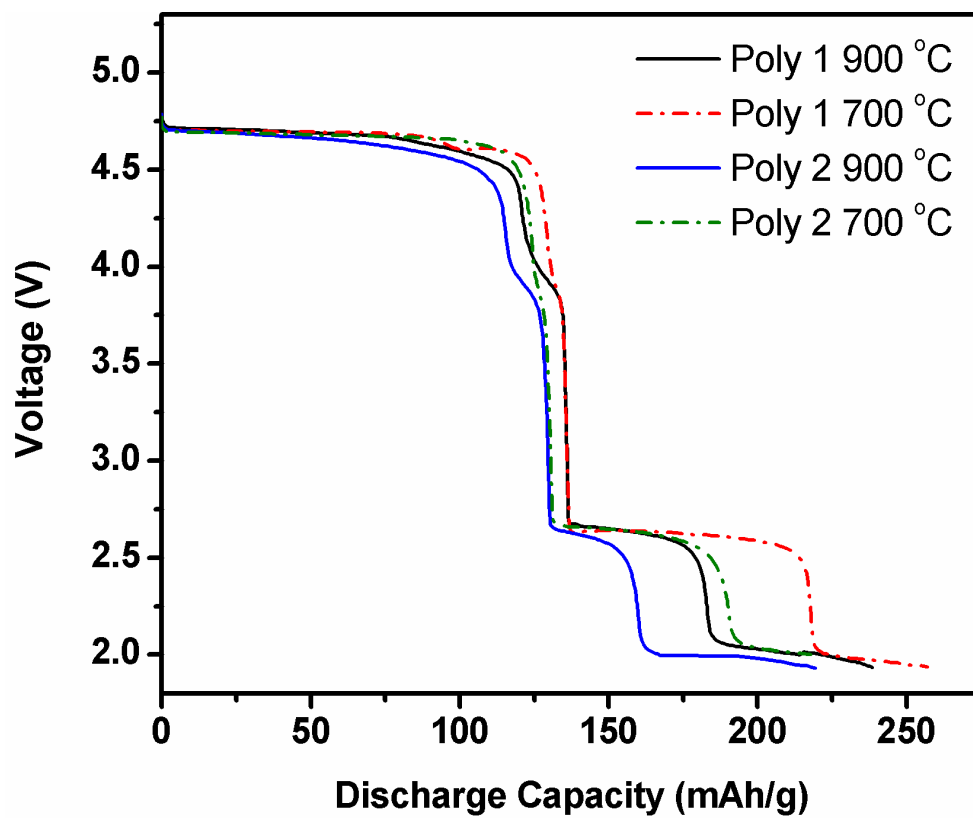

**Figure S3:** Deep discharge to 2.0 V to compare the degree of cation ordering before and after annealing at 700 °C, where longer plateaus at ~ 2.7 V correspond to higher degree of cation ordering.

**Table S1:** First discharge capacity values at different voltage regions

| Sample        | Discharge Capacity (mAh/g) |                    |                    |         |        |
|---------------|----------------------------|--------------------|--------------------|---------|--------|
|               | Total                      | Capacity Above 3 V | Capacity Below 3 V |         |        |
|               |                            |                    | Total              | ~ 2.7 V | ~2.1 V |
| Poly 1 900 °C | 239                        | 136                | 103                | 46      | 57     |
| Poly 1 700 °C | 252                        | 136                | 116                | 81      | 35     |
| Poly 2 900 °C | 216                        | 130                | 86                 | 31      | 55     |
| Poly 2 700 °C | 226                        | 130                | 95                 | 59      | 36     |

**Table S2:** Rietveld fitting data of the XRD of the Polyhedral 1 sample prepared at 900 °C

| State of Charge | Bragg R-factor |         |         | R <sub>f</sub> factor |         |         | $\chi^2$ |
|-----------------|----------------|---------|---------|-----------------------|---------|---------|----------|
|                 | Phase 1        | Phase 2 | Phase 3 | Phase 1               | Phase 2 | Phase 3 |          |
| 0               | 17.94          |         |         | 10.71                 |         |         | 1.99     |
| 20              | 13.54          |         |         | 9.54                  |         |         | 2.34     |
| 40              | 13.56          | 21.70   |         | 10.57                 | 15.81   |         | 2.46     |
| 60              | 9.47           | 12.11   | 15.08   | 6.28                  | 11.84   | 12.76   | 2.28     |
| 80              | 18.35          | 6.45    | 16.57   | 13.47                 | 4.32    | 8.01    | 2.37     |
| 100             |                |         | 16.97   |                       |         | 11.99   | 2.89     |

**Table S3:** Rietveld fitting data of the XRD of the Polyhedral 1 sample annealed at 700 °C

| State of Charge | Bragg R-factor |         |         | R <sub>f</sub> factor |         |         | $\chi^2$ |
|-----------------|----------------|---------|---------|-----------------------|---------|---------|----------|
|                 | Phase 1        | Phase 2 | Phase 3 | Phase 1               | Phase 2 | Phase 3 |          |
| 0               | 18.45          |         |         | 10.74                 |         |         | 3.07     |
| 20              | 18.74          |         |         | 10.45                 |         |         | 3.11     |
| 40              | 17.00          | 20.07   |         | 8.10                  | 12.14   |         | 2.31     |
| 60              | 17.64          | 12.52   |         | 10.60                 | 8.68    |         | 3.16     |
| 80              | 17.02          | 24.13   | 19.77   | 7.47                  | 9.67    | 9.04    | 2.61     |
| 100             |                | 16.25   | 11.79   |                       | 9.58    | 8.28    | 2.54     |

**Table S4:** Rietveld fitting data of the XRD of the Polyhedral 2 sample prepared at 900 °C

| State of Charge | Bragg R-factor |         |         | R <sub>f</sub> factor |         |         | $\chi^2$ |
|-----------------|----------------|---------|---------|-----------------------|---------|---------|----------|
|                 | Phase 1        | Phase 2 | Phase 3 | Phase 1               | Phase 2 | Phase 3 |          |
| 0               | 19.51          |         |         | 10.45                 |         |         | 2.74     |
| 20              | 21.27          |         |         | 11.40                 |         |         | 2.49     |
| 40              | 18.61          | 14.46   |         | 12.12                 | 7.49    |         | 2.66     |
| 60              | 15.98          | 12.68   |         | 10.41                 | 8.10    |         | 3.08     |
| 80              |                | 17.17   | 16.69   |                       | 9.46    | 9.28    | 2.57     |
| 100             |                | 18.65   | 14.75   |                       | 13.15   | 8.94    | 2.95     |

**Table S5:** Rietveld fitting data of the XRD of the Polyhedral 2 sample annealed at 700 °C

| State of Charge | Bragg R-factor |         |         | R <sub>f</sub> factor |         |         | $\chi^2$ |
|-----------------|----------------|---------|---------|-----------------------|---------|---------|----------|
|                 | Phase 1        | Phase 2 | Phase 3 | Phase 1               | Phase 2 | Phase 3 |          |
| 0               | 16.60          |         |         | 9.66                  |         |         | 2.73     |
| 20              | 16.12          | 18.88   |         | 8.79                  | 14.31   |         | 2.35     |
| 40              | 19.48          | 18.64   |         | 9.48                  | 10.93   |         | 2.58     |
| 60              | 20.88          | 16.35   | 19.70   | 11.43                 | 8.71    | 16.94   | 2.39     |
| 80              | 21.95          | 20.19   | 14.65   | 14.27                 | 10.04   | 9.33    | 2.41     |
| 100             |                |         | 16.54   |                       |         | 9.88    | 3.29     |

For Tables S2-S5, the space group refined was assumed to be *Fd-3m*, with Li in the 8a site, Mn:Ni in a 3:1 ratio in 16d sites, and O in 32e sites.

Phase 1 represents a lithiated phase, Phase 2 represents an intermediate phase, and Phase 3 represents a delithiated phase.

**Table S6:** Phase compositions based on Rietveld refinement of Poly 1 samples

| State of Charge | Prepared at 900 °C |         |         | Annealed at 700 °C |         |         |
|-----------------|--------------------|---------|---------|--------------------|---------|---------|
|                 | wt% of Each Phase  |         |         | wt% of Each Phase  |         |         |
|                 | Phase 1            | Phase 2 | Phase 3 | Phase 1            | Phase 2 | Phase 3 |
| 0               | 100                | 0       | 0       | 100                | 0       | 0       |
| 20              | 100                | 0       | 0       | 100                | 0       | 0       |
| 40              | 79.7               | 20.3    | 0       | 73.2               | 26.8    | 0       |
| 60              | 31.2               | 54.5    | 14.3    | 38.6               | 61.4    | 0       |
| 80              | 9.9                | 67.2    | 22.9    | 5.8                | 77.6    | 16.6    |
| 100             | 0                  | 0       | 100     | 0                  | 26.9    | 73.1    |

**Table S7:** Phase composition based on Rietveld refinement of Poly 2 samples

| State of Charge | Prepared at 900 °C |         |         | Annealed at 700 °C |         |         |
|-----------------|--------------------|---------|---------|--------------------|---------|---------|
|                 | wt% of Each Phase  |         |         | wt% of Each Phase  |         |         |
|                 | Phase 1            | Phase 2 | Phase 3 | Phase 1            | Phase 2 | Phase 3 |
| 0               | 100                | 0       | 0       | 100                | 0       | 0       |
| 20              | 100                | 0       | 0       | 78.6               | 21.4    | 0       |
| 40              | 77.2               | 22.8    | 0       | 48.7               | 51.3    | 0       |
| 60              | 72.5               | 27.5    | 0       | 26.5               | 62.2    | 11.3    |
| 80              | 0                  | 71.4    | 28.6    | 13.9               | 62      | 24.1    |
| 100             | 0                  | 27.0    | 73.0    | 0                  | 0       | 100     |
